# Supplementary material for: Efficacy and safety of a new vedolizumab subcutaneous formulation in Japanese patients with moderately to severely active ulcerative colitis
Source: PubMed Central journal article supplement — Intest Res. 2020 Aug 18;19(4):448–60. doi: 10.5217/ir.2020.00026 (PMC8566830; doi:10.5217/ir.2020.00026), 2020-08-18
Supplement: ir-2020-00026-suppl6.pdf [file ir-2020-00026-suppl6.pdf]

**Supplementary Table 1.** Demographic and Baseline Characteristics of Patients Enrolled in the VISIBLE 1 Study (SAF-C)<sup>a</sup>

| Variable                                  | Induction phase             |                     | Maintenance phase (FAS)     |                            |                    |
|-------------------------------------------|-----------------------------|---------------------|-----------------------------|----------------------------|--------------------|
|                                           | Vedolizumab IV<br>(n = 167) | Placebo<br>(n = 56) | Vedolizumab SC<br>(n = 106) | Vedolizumab IV<br>(n = 54) | Total<br>(n = 216) |
| Age (yr) <sup>b</sup>                     | 42.7 ± 15.01                | 39.4 ± 11.70        | 38.1 ± 13.12                | 41.6 ± 14.11               | 39.3 ± 13.05       |
| Male sex                                  | 88 (52.7)                   | 34 (60.7)           | 65 (61.3)                   | 31 (57.4)                  | 130 (60.2)         |
| Race                                      |                             |                     |                             |                            |                    |
| American Indian or Alaskan Native         | 2 (1.2)                     | 1 (1.8)             | 0                           | 0                          | 1 (0.5)            |
| Asian                                     | 39 (23.4)                   | 13 (23.2)           | 14 (13.2)                   | 5 (9.3)                    | 32 (14.8)          |
| Black or African American                 | 1 (0.6)                     | 0                   | 0                           | 2 (3.7)                    | 2 (0.9)            |
| Native Hawaiian or other Pacific Islander | 0                           | 0                   | 0                           | 0                          | 0                  |
| Caucasian                                 | 125 (74.9)                  | 42 (75.0)           | 92 (86.8)                   | 47 (87.0)                  | 181 (83.8)         |
| Multiracial <sup>c</sup>                  | 0                           | 0                   | 0                           | 0                          | 0                  |

Values are presented as mean ± standard deviation or number (%).

<sup>a</sup>Included all randomized patients (n = 216) who received at least 1 dose of study drug.

<sup>b</sup>Age at date of informed consent.

<sup>c</sup>Patient checked more than 1 race option on the case report form.

SAF-C, safety analysis set-combined; FAS, full analysis set; IV, intravenous; SC, subcutaneous.

**Supplementary Table 2.** Fecal Calprotectin by Visit (FAS)

| Variable                 | Maintenance phase (FAS) |                       |                         |
|--------------------------|-------------------------|-----------------------|-------------------------|
|                          | Placebo                 | Vedolizumab SC        | Vedolizumab IV          |
| Baseline, No.            | 10                      | 10                    | 2                       |
| Median (min, max) (µg/g) | 1,145.5 (60, 13,620)    | 4,306.5 (779, 15,445) | 6,812.0 (2,240, 11,384) |
| Week 6, No.              | 10                      | 10                    | 2                       |
| Median (min, max) (µg/g) | 1,353.5 (43, 43,503)    | 374.5 (33, 76,800)    | 1,686.5 (784, 2,589)    |
| Week 30, No.             | 9                       | 10                    | 1                       |
| Median (min, max) (µg/g) | 322.0 (18, 73,172)      | 184.5 (15, 76,800)    | 26                      |
| Week 52, No.             | 2                       | 8                     | 1                       |
| Median (min, max) (µg/g) | 49.0 (48, 50)           | 143.5 (32, 319)       | 16                      |

FAS, full analysis set; SC, subcutaneous; IV, intravenous; min, minimum; max, maximum.
